# Supplementary material for: Maternal yogurt consumption during pregnancy and infantile eczema: a prospective cohort study
Source: Royal Society of Chemistry journal article supplement (doi:10.1039/d2fo02064e), 2023-01-01
Supplement: d2fo02064e1.pdf [file d2fo02064e1.pdf]

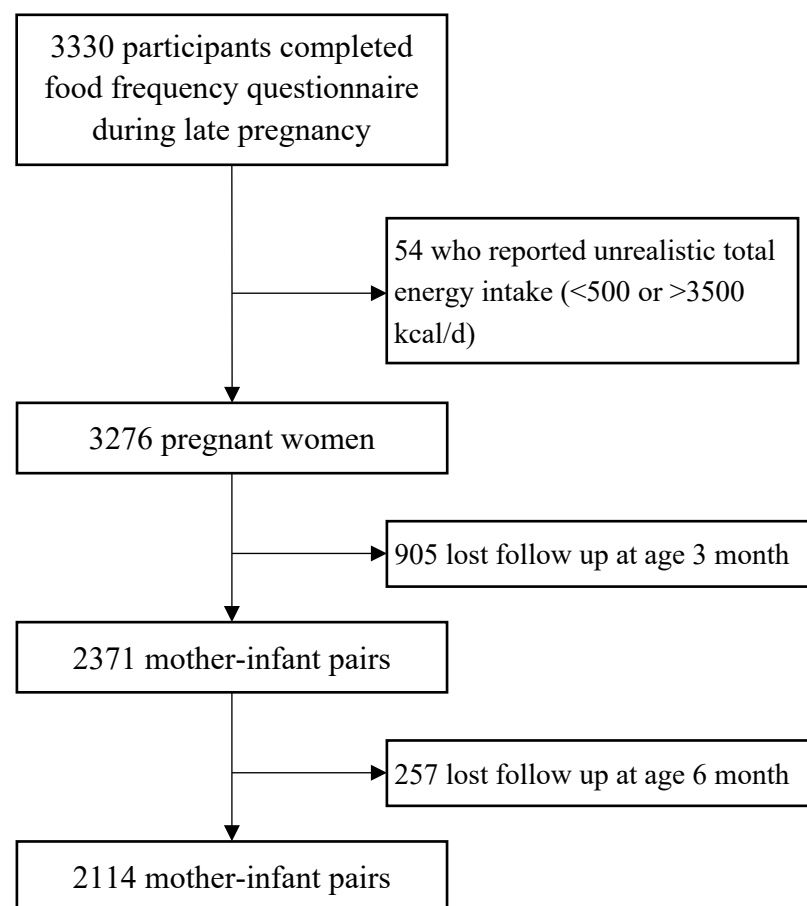

**Supplementary Figure 1.** Flow chart of participants in the Tongji Maternal and Child Health cohort and in the present study.

**Supplementary Table 1.** Maternal yogurt consumption and the risk of infantile eczema between 0~3 and 3~6 months of age among whose mother with neither history of allergy nor smoking habits.

| □                  | Eczema 0~3 months |                                      |                   | □        | Eczema 3~6 months |                                      |                   |
|--------------------|-------------------|--------------------------------------|-------------------|----------|-------------------|--------------------------------------|-------------------|
|                    | N                 | Adjusted <sup>a</sup> RR<br>(95% CI) | <i>P</i><br>value |          | N                 | Adjusted <sup>a</sup> RR<br>(95% CI) | <i>P</i><br>value |
| Yogurt             |                   |                                      |                   |          |                   |                                      |                   |
| No intake          | 561(40)           | (Reference)                          |                   | 506(28)  | (Reference)       |                                      |                   |
| Any intake         | 1557(117)         | 1.05(0.73, 1.51)                     | 0.802             | 1387(47) | 0.54(0.34, 0.87)  | 0.011                                |                   |
| Intake frequencies |                   |                                      |                   |          |                   |                                      |                   |
| Per 1 times/week   | 2118(157)         | 1.01(0.99, 1.02)                     | 0.442             | 1893(75) | 0.97(0.95, 0.99)  | 0.017                                |                   |
| Intake frequencies |                   |                                      |                   |          |                   |                                      |                   |
| None               | 561(40)           | (Reference)                          |                   | 506(28)  | (Reference)       |                                      |                   |

|                    |           |                  |       |          |                  |       |
|--------------------|-----------|------------------|-------|----------|------------------|-------|
| ~3 times/week      | 764(54)   | 0.99(0.66, 1.50) | 0.961 | 674(25)  | 0.62(0.36, 1.06) | 0.082 |
| >3 times/week      | 793(63)   | 1.10(0.74, 1.65) | 0.628 | 713(22)  | 0.47(0.27, 0.83) | 0.009 |
| <i>P</i> for trend |           |                  | 0.547 |          |                  | 0.020 |
| Intake volume      |           |                  |       |          |                  |       |
| Per 10 g/day       | 2118(157) | 1.01(0.99, 1.03) | 0.312 | 1893(75) | 0.96(0.93, 1.00) | 0.035 |
| increment          |           |                  |       |          |                  |       |
| None               | 561(40)   | (Reference)      |       | 506(28)  | (Reference)      |       |
| ~50 g/day          | 478(35)   | 1.02(0.65, 1.61) | 0.933 | 426(16)  | 0.65(0.35, 1.22) | 0.180 |
| >50 g/day          | 1079(82)  | 1.06(0.72, 1.55) | 0.765 | 961(31)  | 0.50(0.30, 0.83) | 0.008 |
| <i>P</i> for trend |           |                  | 0.753 |          |                  | 0.013 |

Abbreviations: CI, confidence interval; RR, rate ratios.

Note: The RR (95% CI) and *P* values generated from Poisson regression models.

<sup>a</sup>Adjusted for maternal age, pre-pregnancy BMI, average personal income, education attainment, birth mode, infant's sex, birth weight, birth seasons, full breastfeeding duration and probiotics supplementation.

**Supplementary Table 2.** Maternal yogurt consumption and the risk of infantile any eczema, recurrent eczema in first 6

months of age among whose mother with neither history of allergy nor smoking habits.

| □                         | Any eczema |                                      |                   | □        | Recurrent eczema |                                      |                   |
|---------------------------|------------|--------------------------------------|-------------------|----------|------------------|--------------------------------------|-------------------|
|                           | N          | Adjusted <sup>a</sup> RR<br>(95% CI) | <i>P</i><br>value |          | N                | Adjusted <sup>a</sup> RR<br>(95% CI) | <i>P</i><br>value |
| <b>Yogurt</b>             |            |                                      |                   |          |                  |                                      |                   |
| No intake                 | 506(52)    | (Reference)                          |                   | 506(11)  | (Reference)      |                                      |                   |
| Any intake                | 1387(143)  | 0.99(0.72, 1.37)                     | 0.956             | 1387(14) | 0.41(0.18, 0.91) | 0.029                                |                   |
| <b>Intake frequencies</b> |            |                                      |                   |          |                  |                                      |                   |
| Per 1 times/week          | 1893(195)  | 1.00(0.99, 1.01)                     | 0.983             | 1893(25) | 0.96(0.93, 1.00) | 0.057                                |                   |
| <b>increment</b>          |            |                                      |                   |          |                  |                                      |                   |
| None                      | 506(52)    | (Reference)                          |                   | 506(11)  | (Reference)      |                                      |                   |
| ~3 times/week             | 674(70)    | 1.01(0.70, 1.45)                     | 0.963             | 674(7)   | 0.44(0.17, 1.17) | 0.100                                |                   |
| >3 times/week             | 713(73)    | 0.97(0.68, 1.40)                     | 0.887             | 713(7)   | 0.38(0.14, 0.99) | 0.047                                |                   |
| <i>P</i> for trend        |            |                                      | 0.851             |          |                  | 0.087                                |                   |
| <b>Intake volume</b>      |            |                                      |                   |          |                  |                                      |                   |
| Per 10 g/day              | 1893(195)  | 1.01(0.99, 1.02)                     | 0.540             | 1893(25) | 0.93(0.86, 1.00) | 0.040                                |                   |
| <b>increment</b>          |            |                                      |                   |          |                  |                                      |                   |
| None                      | 506(52)    | (Reference)                          |                   | 506(11)  | (Reference)      |                                      |                   |
| ~50 g/day                 | 426(43)    | 0.97(0.66, 1.49)                     | 0.956             | 426(6)   | 0.65(0.23, 1.81) | 0.410                                |                   |
| >50 g/day                 | 961(100)   | 0.99(0.71, 1.39)                     | 0.963             | 961(8)   | 0.32(0.13, 0.80) | 0.015                                |                   |
| <i>P</i> for trend        |            |                                      | 0.975             |          |                  | 0.017                                |                   |

Abbreviations: CI, confidence interval; RR, rate ratios.

Note: The RR (95% CI) and *P* values generated from Poisson regression models.

<sup>a</sup>Adjusted for maternal age, pre-pregnancy BMI, average personal income, education attainment, birth mode, infant's sex,

birth weight, birth seasons, full breastfeeding duration and probiotics supplementation.
